# Resource availability and disturbance shape maximum tree height across the Amazon

Eric Gorgens<sup>1</sup>, Matheus Henrique Nunes<sup>2</sup>, Tobias Jackson<sup>3</sup>, David Coomes<sup>3</sup>, Michael Keller<sup>4</sup>, Cristiano Rodrigues Reis<sup>5</sup>, Rubén Valbuena<sup>6</sup>, Jacqueline Rosette<sup>7</sup>, Danilo Roberti Alves de Almeida<sup>5</sup>, Bruno Gimenez<sup>8</sup>, Roberta Cantinho<sup>9</sup>, Alline Zagnolli Motta<sup>1</sup>, Mauro Assis<sup>10</sup>, Francisca Rocha de Souza Pereira<sup>10</sup>, Gustavo Spanner<sup>11</sup>, Niro Higuchi<sup>11</sup>, and Jean Pierre Ometto<sup>10</sup>

<sup>1</sup>Universidade Federal dos Vales do Jequitinhonha e Mucuri

<sup>2</sup>University of Helsinki

<sup>3</sup>University of Cambridge

<sup>4</sup>United States Forest Service

<sup>5</sup>Universidade de São Paulo

<sup>6</sup>Bangor University

<sup>7</sup>Swansea University

<sup>8</sup>Smithsonian Tropical Research Institute

<sup>9</sup>Universidade de Brasília

<sup>10</sup>Instituto Nacional de Pesquisas Espaciais

<sup>11</sup>Instituto Nacional de Pesquisas da Amazônia

May 18, 2020

## 1 **Abstract**

2 The factors shaping the distribution of giant tropical trees are poorly understood, despite its importance as a link  
3 between evolutionary biology and ecosystem biogeochemistry. The recent discovery of clusters of trees over 80  
4 metres tall in the Guiana Shield region of the Amazon rainforest challenges the current understanding of the factors  
5 controlling the growth and survival of giant trees. The new discovery led us to revisit the question: what determines  
6 the distribution of the tallest trees of the Amazon?

7 Here, we used high-resolution airborne LiDAR ( Light Detection and Ranging) surveys to measure canopy height

8 across 282,750 ha of primary old-growth and secondary forests throughout the entire Brazilian Amazon to investigate  
9 the relationship between the occurrence of giant trees and the environmental factors that influence their growth and  
10 survival. Our results suggest that the factors controlling where trees grow extremely tall are distinct from those  
11 controlling their longevity. Trees grow taller in areas with high soil clay content ( $> 42\%$ ), lower radiation ( $< 130$   
12 clear days per year) and wind speeds, avoiding alluvial areas (elevations higher than 40 m a.s.l), and with an optimal  
13 precipitation range of 1,500 to 2,500 mm yr<sup>-1</sup>. We then used an envelope model to determine the environmental  
14 conditions that support the very tallest trees (i.e. over 70 m height). We found that, as opposed to the myriad of  
15 interacting factors that control the maximum height at a large scale, wind speed had by far the largest influence on the  
16 distribution of these sentinel trees, and explained 67% of the probability of finding trees over 70 m in the Brazilian  
17 Amazon forest.

18 The high-resolution pan-Amazon LiDAR data showed that environmental variables that drive growth in height are  
19 fundamentally different from environmental variables that support their survival. While precipitation and temperature  
20 seem to have lower importance for their survival than expected from previous studies, changes in wind and radiation  
21 regimes could reshape our forested biomes. This should be carefully considered by policy-makers when identifying  
22 important hotspots for the conservation of biodiversity in the Amazon.

## 23 **Introduction**

24 The Amazon is the largest rain forest on Earth, covering 5.5 million square kilometres, and stor-  
25 ing about 17% of all vegetation carbon. Ecologists have long taken an interest in comparing the  
26 structure and composition of rain forests across the tropics (Yang *et al.* 2016), and have reached a  
27 consensus that the Amazon supports shorter trees, and therefore stores a lower amount of carbon  
28 per hectare, than the forests of tropical Africa and Asia (Cao & Woodward 1998; Feldpausch *et al.*  
29 2012). However, the recent discovery of giant trees - up to 88 m tall - in the Amazon basin (Gor-  
30 gens *et al.* 2019) challenges this paradigm and poses new questions about the drivers causing the  
31 spatial distribution of tall trees in the Amazon.

32 Previous studies have debated the factors which govern Amazon tree growth and have particularly

33 focused on productivity drivers related to the wet and dry seasons (Huete *et al.* 2006; Morton  
34 *et al.* 2014). This paper's findings inform this important question but extend the investigation  
35 beyond these factors to include the influence of 18 climatic and other environmental conditions on  
36 achieving greatest tree height.

37 Tree height is fundamentally linked to growth, survival, and reproduction strategies, and is ulti-  
38 mately related to the ability to pre-empt light resources and disperse diaspores (Díaz *et al.* 2016).  
39 Xylem conduit diameter and total path length resistance to water flow increase with canopy height,  
40 making water transport to higher leaves more difficult (Koch *et al.* 2004; Givnish *et al.* 2014). To  
41 counteract this difficulty, taller species have higher xylem hydraulic conductivity but are more vul-  
42 nerable to xylem embolism (Liu *et al.* 2019). Across species, higher wood density, and stomata  
43 closure in response to water deficit are often positively related to embolism resistance (Bennett *et*  
44 *al.* 2015; McDowell & Allen 2015; Greenwood *et al.* 2017). Height growth is partly governed by  
45 small-scale factors such as water availability, temperature, rooting depth, and soil type (Anderegg  
46 *et al.* 2016; McDowell & Allen 2015; Coomes *et al.* 2006; Niklas 2007), with precipitation and  
47 potential evapotranspiration consistently reported as key factors determining plant height across  
48 biomes (Moles *et al.* 2009; Larjavaara 2013; Rueda *et al.* 2016).

49 Forest giants are disproportionately vulnerable to disturbances and thus their conservation requires  
50 particular attention (Pennisi 2019; Yanoviak *et al.* 2019; Stovall *et al.* 2019; Enquist *et al.* 2020).  
51 To reach such immense sizes, trees must fulfill at least three conditions: they must (1) have an  
52 evolutionary design that is capable of transporting water to great heights and overcome highly  
53 negative water potentials to deliver that water toward tissues in the upper canopy; (2) inhabit an  
54 area with optimal environmental conditions (such as climate, soil properties, and water) that meet  
55 species-specific requirements (Simard *et al.* 2018; Scheffer *et al.* 2018) and (3) grow in regions  
56 with a low frequency of natural or anthropogenic disturbance events (Larjavaara 2013; Linden-  
57 mayer & Laurance 2016; Scheffer *et al.* 2018; Enquist *et al.* 2020). Resource availability (e.g.

58 sunlight, nutrients, CO<sub>2</sub>, and water) controls a tree's ability to produce biomass through photosyn-  
59 thesis. Natural disturbances (e.g. windthrow, drought, or lightning) and history of anthropogenic  
60 actions (e.g. selective logging, forest fragmentation) increase the likelihood of mortality and limit  
61 the time available to trees to grow taller (Bennett *et al.* 2015; Powers *et al.* 2020; Yanoviak *et*  
62 *al.* 2019; Almeida *et al.* 2019). Tall trees are likely to have developed strategies for surviving  
63 diseases and pathogens (van Gelder *et al.* 2006; Aleixo *et al.* 2019) as well as climatic fluctu-  
64 ations (Sakschewski *et al.* 2016) and resisting wind damage (Jagels *et al.* 2018). However, the  
65 question of how resource supply and disturbances interact to determine canopy height across the  
66 Amazon has not been fully explored.

67 The sheer size of the Amazon, its environmental heterogeneity and species diversity, pose chal-  
68 lenges and practical difficulties to understand general ecological relationships and biogeographical  
69 patterns (Tuomisto *et al.* 2019). Forest plots provide many valuable insights to investigate the  
70 influences of the environment on tree height but they can only represent a minuscule fraction of  
71 the total forest area (Chave *et al.* 2020). Currently, a network of 5,351 forest inventory plots  
72 established across the Brazilian Amazon, of known and published sites recently compiled by (Te-  
73 jada *et al.* 2019), represents only 0.0013% of the total forest area in this region. In addition, the  
74 plot distribution is spatially clustered in close proximity to major roads or large rivers (Stropp *et*  
75 *al.* 2020), implying a spatial distribution bias (Marvin *et al.* 2014) since about 42% of the total  
76 Brazilian Amazon lies over 50 km from the nearest forest inventory plots (Tejada *et al.* 2019). Re-  
77 mote sensing can remove sampling biases and uncertainty about ecological patterns (Schimel *et al.*  
78 2015) and provides large datasets with which to uncover the environment controls of forest struc-  
79 ture (Asner *et al.* 2010). In particular airborne LiDAR (Light Detection and Ranging) generates  
80 valuable high-resolution 3D information of forest canopy structure (Görgens *et al.* 2016; Coomes  
81 *et al.* 2017), and can be used as an intermediary to integrate field data with satellite sources (Asner  
82 2009; Bae *et al.* 2019).

83 The “Improving Biomass Estimation Methods for the Amazon” (EBA) project performed high-  
84 resolution LiDAR flights over 3 years, totaling more than 800 transects across mature and sec-  
85 ondary forests in the Brazilian Amazon (for more information about the EBA project see the  
86 Method section). The transects were randomly distributed considering both spatial location of the  
87 start point and flight direction, allowing us to conduct statistical design-based models of tree height  
88 since there is a growing consensus that ecosystem traits like tree height can be better measured with  
89 LiDAR than other methods (Valbuena et al. 2020). A total of 282,750 ha were covered, 0.183% of  
90 the Brazilian Amazon, which is 100 times the area of available permanent plot networks (Tejada  
91 *et al.* 2019). This unprecedented dataset has led to remarkable discoveries in Amazon (Gorgens *et*  
92 *al.* 2019; Pereira *et al.* 2019; Santos *et al.* 2019; Almeida *et al.* 2019). In this study, we employed  
93 it to contribute to our understanding of how resources and disturbances shape the maximum height  
94 distribution across the Brazilian Amazon. We conducted an extensive analysis relating remotely  
95 sensed environmental variables to the maximum height recorded in the transects. We concluded  
96 that drivers of height development are fundamentally different from those influencing the survival  
97 of tree giants. Thus changes in wind and light availability shape their distribution as much as  
98 precipitation and temperature, altogether shaping the demographics and composition of forested  
99 biomes.

## 100 **Material and methods**

101 Between 2016 and 2018, an airborne mission (held by National Institute for Space Research -  
102 INPE and funded by Amazon Fund) collected airborne LiDAR data from 906 transects of 375  
103 ha (12.5 x 0.3 km) each, randomly spread across primary and secondary forests defined by the  
104 PRODES database - layer mask of primary old-growth forests (**PRODES, INPE, 2016**) and by the  
105 TerraClass database - a layer mask of secondary forest (**TerraClass, INPE, 2014**).

106 The LiDAR sensor was the Trimble Harrier 68i (Trimble, California, USA) aboard a Cessna 206

107 aircraft. The average pulse density was set at 4 pulses  $\text{m}^{-2}$ , the field of view equal to  $30^\circ$ , and  
108 flying altitude of 600 m. The Global Navigation Satellite System (GNSS) collected data on a dual-  
109 frequency receiver (L1/L2). The pulse footprint was set to be below 30 cm, based on a divergence  
110 angle between 0.1 and 0.3 mrad. Horizontal accuracy was controlled to be under 1 m, and the  
111 vertical accuracy to be under 0.5 m.

112 Details about LiDAR parameterization, processing, and the EBA project characteristics can be  
113 consulted in ([Gorgens \*et al.\* 2019](#)). Briefly, each transect was processed by identifying the re-  
114 turns backscattered from the ground and interpolating a 1m spatial resolution digital terrain model  
115 (DTM) from them. Then, the DTM was employed to calculate the heights above ground from the  
116 returns backscattered from the vegetation ([Görgens \*et al.\* 2016](#)). The uppermost vegetation heights  
117 were then employed to compute a canopy height model CHM at the same spatial resolution as  
118 the DTM. The height of the tallest tree per transect was identified from the CHM using a local  
119 maximum moving window algorithm ([Dalponte & Coomes 2016](#)). All transects were finally ma-  
120 nually inspected to exclude non-trees maximum derived from artifacts, ensuring that all the largest  
121 heights indeed depicted a tall tree.

## 122 **Environmental variables**

123 To investigate drivers influencing the spatial distribution of giant trees, we initially considered a  
124 total of 18 environmental variables: (1) fraction of absorbed photosynthetically active radiation  
125 (FAPAR; in %); (2) elevation above sea level (Elevation; in m); (3) the component of the horizon-  
126 tal wind towards east, i.e. zonal velocity (u-speed ; in  $\text{m s}^{-1}$ ); (4) the component of the horizontal  
127 wind towards north, i.e. meridional velocity (v-speed ; in  $\text{m s}^{-1}$ ); (5) the number of days not affected  
128 by cloud cover (clear days; in  $\text{days yr}^{-1}$ ); (6) the number of days with precipitation above 20 mm  
129 (days  $> 20\text{mm}$ ; in  $\text{days yr}^{-1}$ ); (7) the number of months with precipitation below 100 mm (months  
130  $< 100\text{mm}$ ; in  $\text{months yr}^{-1}$ ); (8) lightning frequency (flashes rate); (9) annual precipitation (in

131 mm); (10) potential evapotranspiration (in mm); (11) coefficient of variation of precipitation (pre-  
132 cipitation seasonality; in %); (12) amount of precipitation on the wettest month (precip. wettest; in  
133 mm); (13) amount of precipitation on the driest month (precip. driest; in mm); (14) mean annual  
134 temperature (in °C); (15) standard deviation of temperature (temp. seasonality; in °C); (16) annual  
135 maximum temperature (in °C); (17) soil clay content (in %); and (18) soil water content (in %).

136 The FAPAR was derived from land surface reflectance product calibrated and corrected from the  
137 National Oceanic and Atmospheric Administration's (NOAA) Advanced Very High-Resolution  
138 Radiometer (AVHRR), which is a consistent time-series dataset spanning from the mid-1980s to  
139 present and suitable for climate studies (Tao *et al.* 2016). FAPAR is a primary vegetation variable  
140 controlling the photosynthetic activity of plants and is considered an essential climate variable (Ma-  
141 son *et al.* 2010). The algorithm to create this layer relies on artificial neural networks calibrated  
142 with the MODIS FAPAR dataset and validated using a set of globally-distributed sites. The inputs  
143 to generate the FAPAR were 1) the surface reflectance from NOAA-AVHRR which is measured  
144 in two wavelengths (red, 580–680 nm, and near-infrared, 725–1000 nm); 2) a reference dataset  
145 from MODIS FAPAR to calibrate the NOAA-AVHRR FAPAR; and 3) a land cover map classi-  
146 fication, used to stratify the outputs. Five land cover classes were included: evergreen broadleaf  
147 forest, deciduous broadleaf forest, needle leaf forest, shrubland, croplands and grasslands, and  
148 non-vegetated (Claverie *et al.* 2016).

149 The elevation was computed based on the third version of the Shuttle Radar Topography Mission  
150 (SRTM) provided by National Aeronautics and Space Administration Jet Propulsion Lab (NASA  
151 JPL) (Farr *et al.* 2007; Liu *et al.* 2014). The SRTM mission was launched on Space Shuttle Endeav-  
152 or on 11th February 2000 and collected data during ten days of operations, using two synthetic  
153 aperture radars: NASA's C band system (5.6 cm wavelength) and an X band system by DLR (3.1  
154 cm). The C-band digital elevation model (DEM) used in this study is now available at 30-m spati-  
155 al resolution from 60° north latitude and 56° south latitude, covering 80% of Earth's land surface.

156 C-band partially penetrates the vegetation canopy, with depth varying with vegetation structure.  
157 Since Amazonian vegetation is dense throughout, for the purposes of this study the C-band DEM  
158 is assumed to vary consistently with topography across the region.

159 We used the maximum daily mean wind speeds over the last 5 years from the fifth major glo-  
160 bal reanalysis (ERA5) produced by the European Centre for Medium-Range Weather Forecasts  
161 (ECMWF). The reanalysis combined model data with observations from across the world into a  
162 globally complete and consistent dataset (Olauson 2018). The products from a reanalysis include  
163 many variables such as wind speeds, temperature, and atmospheric pressure. They were produced  
164 on reduced Gaussian grids, by using a different number of grid points along different latitudes  
165 and thus keeping the grid point separation in metres approximately constant. ERA5 has an hourly  
166 resolution and spans from 1950 to near real-time. Two wind velocities were considered: u-speed  
167 which is the zonal velocity (i.e. the component of the horizontal wind towards east), and v-speed  
168 which is the meridional velocity (i.e. the component of the horizontal wind towards north). These  
169 products are used extensively for modelling wind power both in academia and industry (Olauson  
170 2018; Albergel *et al.* 2019; Ramon *et al.* 2019).

171 The number of clear days was computed based on Moderate Resolution Imaging Spectroradio-  
172 meter (MODIS) surface reflectance products. MODIS products provide an estimate of the surface  
173 spectral reflectance as it would be measured at ground level in the absence of atmospheric scat-  
174 tering or absorption (Kang *et al.* 2005; Bisht & Bras 2010). MODIS operates onboard Terra and  
175 Aqua satellites. Terra satellite has a 10:30 am equator over-passing time, and the  $\pm 55^\circ$  scanning  
176 pattern at 705 km altitude achieves a 2,330 km swath that provides global coverage every one to  
177 two days (Ruhoff *et al.* 2012). We used the Terra MOD09GA Version 6 product, which provides  
178 an estimate of the surface spectral reflectance of MODIS, corrected for atmospheric conditions  
179 such as gases, aerosols, and Rayleigh scattering.

180 Temperature and precipitation were obtained from the WorldClim database of bioclimatic varia-



181 bles, which are derived from weather station data compiled for the 1950–2000 period ([Hijmans \*et\*](#)  
182 [al. 2005](#); [Fick & Hijmans 2017](#)). The main source of data was the Global Historical Climatolo-  
183 gy Network (GHCN), complemented with other global, national, regional, and local data sources,  
184 which were added if they were further than 5 km away from stations already included in the GH-  
185 CN. After removing stations with errors, the final database consisted of precipitation records from  
186 47,554 locations, mean temperature from 24,542 locations, and minimum and maximum tem-  
187 peratures from 14,835 locations. To interpolate the weather station data, latitude, longitude, and  
188 elevation were used as independent variables.

189 The lightning frequency was provided by Lightning Imaging Sensor (LIS) instrument onboard  
190 the Tropical Rainfall Measuring Mission provided by NASA Earth Observing System Data and  
191 Information System (EOSDIS) Global Hydrology Resource Center. The LIS was launched in No-  
192 vember 1997 into a precessing orbit inclination of 35° at an altitude of 350 km and was powered off  
193 in April 2015. The LIS datasets were collected during 16 years (1998–2013) and they are available  
194 at 0.1° spatial resolution (approx. 11 km in the equator). The LIS provided the basis for the develop-  
195 ment of a comprehensive global thunderstorm and lightning climatology to detect the distribution  
196 and variability of total lightning occurring in the Earth. This information is used for severe storm  
197 detection and analysis, and also for lightning-atmosphere interaction studies ([Albrecht \*et al.\* 2016](#)).

198 The potential evapotranspiration was provided by the TerraClimate dataset, a global monthly cli-  
199 mate and water balance for terrestrial surfaces spanning 1958–2015. The layer used climatically ai-  
200 ded interpolation (bilinear interpolation of temporal anomalies), combining high-spatial-resolution  
201 climatological normals from WorldClim with Climate Research Unit (CRU) Ts4.0 and the Japa-  
202 nese 55-year Reanalysis (JRA-55) data. The CRU Ts4.0 provides monthly average maximum and  
203 minimum temperature, vapor pressure, and cumulative precipitation from 1901–2015. The JRA-  
204 55 is the longest-running (1958–present) observing-system and provides spatially and temporally  
205 complete data for mean temperature, vapor pressure, wind speed, downward shortwave flux at the

206 surface, and accumulated monthly precipitation. The Reference Evapotranspiration was calculated  
207 using the Penman-Monteith approach (Abatzoglou *et al.* 2018).

208 The number of months per year with precipitation below 100 mm and the number of days per ye-  
209 ar with precipitation above 20 mm was computed based on the Climate Hazards Group InfraRed  
210 Precipitation with Station data (CHIRPS) dataset. CHIRPS incorporated 0.05° resolution satellite  
211 imagery with in-situ station data to create gridded rainfall time series for trend analysis and seaso-  
212 nal drought monitoring (Funk *et al.* 2015). The CHIRPS process involves three main components:  
213 1) the Climate Hazards group Precipitation climatology (CHPclim), 2) the satellite-only Climate  
214 Hazards group Infrared Precipitation (CHIRP), and 3) the station blending procedure that produces  
215 the CHIRPS. Two sets of monthly historical long-term means were used to create the CHPclim.  
216 The first set was a collection of 27,453 monthly stations obtained from the Agromet Group of the  
217 Food and Agriculture Organization of the United Nations (FAO). The second set of 20,591 stati-  
218 ons was taken from version two of the Global Historical Climate Network (GHCN). The CHIRP  
219 relies on two global thermal infrared archives that are: the 1981–2008 Globally Gridded Center Sa-  
220 tellite (GriSat) produced by NOAA’s National Climate Data and the 2000-present dataset NOAA  
221 Climate Prediction Center. The CHIRPS station datasets were obtained from the GHCN month-  
222 ly, GHCN daily, Global Summary of the Day, Global Telecommunication System and Southern  
223 African Science Service Centre for Climate Change and Adaptive Land Management. The stati-  
224 on blending procedure that produces CHIRPS is a modified inverse distance weighting algorithm.  
225 Daily CHIRPS are then produced for the globe by using daily Cold Cloud Duration (CCD) data  
226 to identify non-precipitating days. Whenever the daily CCD is zero, precipitation is assumed to be  
227 zero.

228 Edaphic variables were obtained from The OpenLandMap produced by the OpenGeoHub Founda-  
229 tion and contributing organizations. Soil texture is connected with soil granulometry or the com-  
230 position of the particle sizes (clay, silt, and sand), typically measured as volume percentages. The

231 clay content (fine particles  $< 2 \mu\text{m}$ ) and water content layers, both with a spatial resolution of 250  
232 m, were created based on machine learning predictions from a global compilation of soil profiles  
233 and samples (Arsanjani *et al.* 2014).

234 To help visualization of the regional-level, we divided the Brazilian Amazon into eight regions,  
235 according to the classification of (Morrone 2014): I - Para; II - Xingu-Tapajos; III - Roraima; IV -  
236 Guianan Lowlands; V - Madeira; VI - Yungas; VII - Pantepui; VIII - Imeri. This regionalization is  
237 based on biogeographic analyses of terrestrial plant and animal taxa of the Neotropical region and  
238 seeks to provide universality, objectivity, and stability, such that it can be applied when describing  
239 distributional areas of particular taxa or comparing different biogeographic analyses.

## 240 **Random Forest and Maximum Entropy**

241 To better understand the environmental requirements for development in tree height, we employed  
242 Random Forest modelling and marginal plots to observe the relative variable importance. Among  
243 the initial 18 environmental variables, two of them (precipitation on driest month and months  $<$   
244 100mm) were excluded due to high correlation ( $> 0.80$ ) to other independent variables (Table 1).  
245 Using the coordinates of the tallest tree within each lidar transect, we extracted the values from the  
246 variable layers. Tree height was then modeled against the factors using a random forest algorithm,  
247 which recursively computes classification and regression trees (CART) from random subsets, a  
248 k-fold ( $k = 15$ ) cross-validation method, and 500 as the number of CART. The number of variables  
249 randomly sampled as candidates at each split was set to 10. The adjusted model was evaluated  
250 considering the mean absolute error (MAE), root mean squared error (RMSE), and coefficient of  
251 determination ( $R^2$ ) of cross-validated predicted versus observed values. To assess the overall rela-  
252 tive variable importance we used the mean decrease in Gini importance, which evaluates at each  
253 split in each tree, how much each variable contributes to decreasing the weighted impurity (i.e.,  
254 variance in the case of regression trees). The resulting Random Forest model was finally imple-

255 mented using the environmental variables to deliver a map of estimated heights of tallest trees  
256 across the Amazon. Then we focused on the tallest trees only - those over 70 m in height - to  
257 determine the conditions which allow them to survive. We employed a maximum entropy en-  
258 velope approach (MaxEnt) commonly applied to modelling species geographic distributions with  
259 presence-only data and indicate better discrimination of suitable versus unsuitable areas for the  
260 species (Phillips *et al.* 2006). The variable importance of the MaxEnt model was used to indicate  
261 the most relevant characteristics sustaining extreme height individuals and the potential location  
262 for new occurrence. The observations higher than 75 m were filtered out and used to adjust an  
263 envelope model based on maximum entropy. In its optimization routine, the algorithm tracked  
264 how much the model gain was improved when small changes were made to each coefficient value  
265 associated with a particular variable. Each variable was then ranked based on the proportion of  
266 all contributions. The resulting MaxEnt model was finally implemented using the environmental  
267 variables to deliver a map of probability of occurrence for trees taller than 70 m across the Amazon.

## 268 **Results**

269 Trees exceeded 50 m in height across many parts of the Brazilian Amazon, but trees over 80 m were  
270 only observed in the eastern Amazon (micro-region III, Roraima Province; Fig. 1). To examine  
271 why the trees grow taller in some regions and determine the environmental variables modulating  
272 height pattern in the Amazon, we predicted maximum tree height as a function of environmental  
273 variables using a Random Forest approach. The number of clear days, clay content in the soil,  
274 elevation and mean annual precipitation were found to be the strongest drivers of maximum tree  
275 height, while the average monthly temperature and soil water content were weak predictors (Ta-  
276 ble 2). The Random Forest model obtained MAE = 3.62 m, RMSE = 4.92 m, and  $R^2 = 0.735$ . A  
277 resulting map of Random Forest model predicted maximum tree height shows that occurrence  
278 is highest in eastern Amazon (Fig. 2), with the tallest trees more specifically achieving greatest

279 heights in the northeastern part of Roraima (III), in Pantepui (VII) and in the confluence of Ma-  
280 deira (V) and Xingu-Tapajos (II). Since low values of FAPAR are related to degraded forests and  
281 anthropogenic regions, we performed the same analysis after excluding areas with FAPAR values  
282 under 80%, which resulted in the elimination of 133 transects. Similar spatial distributions for ma-  
283 ximum tree height persisted similarly after removing these potential anthropogenic effects (Fig. 3),  
284 demonstrating that the underlying patterns we report are naturally driven by the environmental fac-  
285 tors.

286 The marginal plot obtained for each environmental variable in the random forest model, allows  
287 us to interpret its influence on the height of tall trees directly in the units that correspond to each  
288 (Fig. 4). Lines close to horizontal indicate a given environmental factor having little effect on the  
289 height of tall trees. The number of clear days was the strongest predictor of maximum height  
290 (Table 2). The shape of this relationship resembles a step function (Fig. 4), in which regions with  
291 the number of clear days below 130 days per year support tall trees, above this level, we observe  
292 an abrupt decline in maximum height. Elevation was also a key predictor of tree height, with low-  
293 lying forests growing 7 m lower than trees in terrains above 40 m above sea level. An increase  
294 in soil clay content from 20% to 40% translated into a 7 m increase in maximum height. Our  
295 results also demonstrate mean annual precipitation as a key factor for trees to grow taller, with  
296 a tolerance curve peaking at around 2,300 mm yr<sup>-1</sup> as optimal annual precipitation across the  
297 Brazilian Amazon. In comparison to these areas, we observe a 4 m decline in maximum tree  
298 height in regions with annual precipitation below 1,500 mm yr<sup>-1</sup> or above 3,000 mm yr<sup>-1</sup>. From the  
299 intermediate importance variables, we highlight the zonal velocity (u-speed) and FPAR influencing  
300 height variation in ranges around 6 m.

301 The results of the MaxEnt approach are focusing on the survival of trees taller than 70 m in height  
302 (Fig. 5). The extraordinarily tall trees had a unique niche, characterized by a much smaller set  
303 of environmental variables from those which drove the large-scale patterns of maximum height.

304 The maximum entropy model shows that the niche is dominated mostly by wind speed (relative  
305 importance of 67.7 %). The second most important driver of tall tree survival was the elevation  
306 above sea level (relative importance of 12.3 %). It is worthwhile noting that relative importance  
307 values reflect the proportion of all contributions to explain the presence of the tallest trees. The  
308 resulting map of predicted occurrence of the tallest trees in the Amazon from the MaxEnt model  
309 shows that the probability of maximum tree height occurrence is highest in northeastern Amazon  
310 (Fig. 6), more specifically in the Roraima (III) and Guianan Lowlands (IV).

## 311 Discussion

312 The locations of the tall trees in the eastern and southern Amazon coincide with forests that have  
313 a high basal area predicted by statistical modelling of permanent plot data (Malhi *et al.* 2006).  
314 The basal area generally declines with increasing dry season length, for regions with dry seasons  
315 lasting four months or longer. Young soils nearer the Andes, as well as the sedimented and flooded  
316 lowlands, are richer in nutrients, thereby supporting fast-growing, low wood density species with  
317 high turnover rates and, as a result, the trees do not reach extremely large sizes (Marra *et al.* 2014;  
318 Quesada *et al.* 2011; Phillips *et al.* 2004). The species *Dinizia excelsa* (Ducke), for example,  
319 has been reported as the tallest trees in the Amazon reaching 88 m in height in the region of  
320 Roraima (Gorgens *et al.* 2019), and also has been reported as the highest average species-level  
321 wood density in the Amazon of 0.94 g cm<sup>-3</sup> (Fauset *et al.* 2015) with a large contribution to the  
322 total forest biomass.

323 Many physiological and structural traits in the Amazon have strong phylogenetic associations with  
324 effects on tree growth and mortality (Baker *et al.* 2004; Fyllas *et al.* 2012; Patiño *et al.* 2012).  
325 Forests of the western Amazon are more homogeneous in composition at the family (Myristi-  
326 caceae, Arecaceae, Moraceae) and species levels (Condit 2002; Pitman *et al.* 2001), while species  
327 from eastern Amazonian have broadly different patterns of family-level composition being dom-

328 inated by the Sapotaceae, Chrysobalanaceae, Fabaceae and Lecythidaceae (Chave *et al.* 2006).  
329 Wood density is driven by shifts in tree species composition (Terborgh & Andresen 1998) and tends  
330 to peak in the slow-growing forests on infertile soils in eastern Amazon and the Guyanas (Malhi  
331 *et al.* 2006). Soil physical properties in combination with limited nutrient supply in eastern Ama-  
332 zon favour slow-growing species and increases species that invest their resources in structures  
333 that can support taller and bigger trees with a long lifespan (Malhi *et al.* 2004; Quesada *et al.*  
334 2009). Temperature and dry season precipitation effects on the structure and wood density are  
335 more ambiguous (Quesada *et al.* 2012), although species with higher wood density are better able  
336 to resist drought-induced embolism (Hacke *et al.* 2001) and therefore tolerate longer periods of  
337 high vapor water deficit and evaporative demand (McDowell *et al.* 2018). This myriad of environ-  
338 mental variables with confounding effects on species composition, as well as on their physiological  
339 and structural traits, play a crucial role in the tree lifespan and the size of trees (Muller-Landau  
340 2004).

### 341 **Conditions supporting tall trees**

342 In our study, the low wind speed was determined as the single most important predictor of the  
343 occurrence of the tallest trees in the Brazilian Amazon. The fact that trees adapt to their wind en-  
344 vironment and are shorter in windy locations has been widely observed in temperate regions (Bon-  
345 nesoeur *et al.* 2016; Telewski 2006). We can see a similar effect across the Amazon, with trees over  
346 70 m tall having a 50-75% likelihood of surviving in the calmest areas but a sharply decreasing  
347 probability with stronger winds. This agrees with previous findings that disturbance rates are far  
348 higher in the Western Amazon (Espírito-Santo *et al.* 2014) and may demonstrate how significant  
349 the role of wind is in shaping the niche for extraordinarily tall trees. The importance of wind speed  
350 was also apparent in the Random Forest model which showed a 9 m reduction in the estimated  
351 tree height from the calmest to the windiest areas (Figure 2). The zonal velocity (i.e. the eastward

352 component), which is the prevailing wind direction in the region, drives this pattern. Interestingly,  
353 our data showed that the lightning rate was only weakly related to maximum forest height patterns  
354 in both the Random Forests and MaxEnt models. Despite being relevant to the death of individual  
355 trees (Marra *et al.* 2014; Bonnesoeur *et al.* 2016; Niklas 1998) and being the key factor causing  
356 tree deaths in tropical forests of Panama (Yanoviak *et al.* 2019), lightning and storms do not seem  
357 to impact the potential dominant tree of a region, nor to limit the survival of the tallest trees, in  
358 light of our results.

359 A balance between tree structural strength and wind shearing forces contributes to set an upper  
360 limit to tree height development (Klein *et al.* 2015). The wind has a direct effect on tree height,  
361 since trees adapt their growth rates to their local wind environment, although the scale of this effect  
362 is unknown (Telewski 2006; Bonnesoeur *et al.* 2016). Extreme wind speeds, often associated  
363 with convective storms in the tropics, can also snap or uproot trees. Large-scale wind patterns  
364 in the Amazon are dominated by the easterly trade winds. Wind damage is most common from  
365 September to February (Negrón-Juárez *et al.* 2017) and taller trees have higher rates of mortality  
366 in wind storms (Rifai *et al.* 2016). Remote sensing analyses have shown that disturbance rates are  
367 much higher in the western Amazon compared to the east (Espírito-Santo *et al.* 2014).

368 A decrease in cloud-free days goes together with an increase in solar radiation (Barkhordarian  
369 *et al.* 2019), which, along with changes in the Vapor Pressure Deficit, or atmospheric dryness,  
370 drive changes in the physiological function of trees (Williams *et al.* 2012; Nunes *et al.* 2019).  
371 The increase in diffuse radiation led by cloudy conditions induces an increase in photosynthetic  
372 activity (Gu 2003). Tree responses to direct solar radiation are dependent on the species and  
373 developmental stage, with physiological and structural changes to maximize either growth or sur-  
374 vival (Wright *et al.* 2004; Nunes *et al.* 2019; Poorter & Bongers 2006). As the traits of individual  
375 trees are at least conserved at the species level, additional variation is determined by the local en-  
376 vironment (Fyllas *et al.* 2009). As trees grow taller, increasing leaf water stress due to gravity and



377 path length resistance may limit leaf expansion and photosynthesis for further height growth (Koch  
378 *et al.* 2004). Tall trees have direct exposure to sunlight and high temperatures lead to higher stom-  
379 atal control to avoid excessive water loss (Drake *et al.* 2018; Rowland *et al.* 2015).

380 Elevation was also a key predictor of tree height, with low-lying forests growing potentially less  
381 than trees in terrains over 40 m a.s.l. (Fig. 4). The topographic gradient is likely to be related to the  
382 likelihood of flooding in the low elevation transects on the lowlands. Rivers erode the *terra firme*  
383 terraces and create floodplains of variable sizes dating to the Miocene, with terrace–floodplain ele-  
384 vation differences decreasing eastwards from the Andes (Hamilton *et al.* 2007). Shifts in multiple  
385 canopy chemical traits between the terrace and floodplain forests in the Amazon are paralleled by  
386 species turnover, which reveals the micro-topography effects on the growth-defense trade-off in  
387 Amazonian forests, and its associated processes of nutrient mobilization and deposition (Asner *et*  
388 *al.* 2015). The species and trait shifts with topographical variation in the Amazon also confers  
389 an adaptive drought resistance, with species from the plateaus more susceptible to prolonged peri-  
390 ods with lower soil water content, and, therefore, investing in higher hydraulic safety with higher  
391 wood density, lower mean vessel hydraulic diameter, lower mean vessel area and smaller stem  
392 cross-sectional sapwood area than species in valley forests (Cosme *et al.* 2017).

393 An increase in soil clay content also translated into an increase in maximum height. Clay content  
394 is usually highest on flat terrain (Laurance *et al.* 1999) decreasing from about 75% to 5% when  
395 moving from the plateau areas to the valleys (Ferraz *et al.* 1998; Toledo *et al.* 2016). Previous  
396 studies also indicated the presence of clayey soil in the plateau areas of the Amazon (Broedel *et*  
397 *al.* 2017; Cerri & Volkoff 1987; Marques *et al.* 2002; Marques *et al.* 2004; Marques *et al.* 2015).  
398 Our results suggest that 1) if the clayey soils of our study occur in the plateau areas with lower  
399 soil water content, a shift of species associated with the plateaus favoured species with higher  
400 hydraulic safety, otherwise 2) access to structured soils seems to be essential for trees to grow  
401 taller. A previous study showed an increase in wood density from stands on sandy soils in valleys

402 to clayey soils on plateaus at a local scale in Central Amazon, and lower tree mortality rates in  
403 clayey soils (Toledo *et al.* 2016). These patterns were primarily driven by soil moisture - correlated  
404 to depth to water table - causing shifts in tree community composition (Schietti *et al.* 2013), and  
405 favouring higher hydraulic safety in the lower soil moisture areas of the plateaus (Toledo *et al.*  
406 2016; Cosme *et al.* 2017). We suggest that the structured soils allow trees to obtain an additional  
407 volume of water during the dry season towards eastern Amazon, where soils tend to be richer in  
408 clay compared to central and western Amazon (Fisher *et al.* 2008; Hodnett *et al.* 1997). The  
409 dimorphic root systems associated with structured, clayey soils can redistribute water from deep  
410 layers to the soil surface during periods of drought (Broedel *et al.* 2017).

411 Chemical and physical properties of soils across the Amazon Basin tend to correlate with variations  
412 in and type of parent material, and exhibit an east-west soil age gradient (Quesada *et al.* 2011).  
413 This edaphic variation across geological formations has strong influences on the floristic, structural  
414 and demographic patterns in the Amazon (Quesada *et al.* 2012; ter Steege *et al.* 2006), with abrupt  
415 changes in species composition following changes in soil properties and topography (Phillips *et*  
416 *al.* 2003; Higgins *et al.* 2011). These patterns reflect more than a simple east-west gradient, due to  
417 a complex history of deposition and erosion dating to the Miocene (Higgins *et al.* 2011). Despite  
418 the clear heterogeneity caused by abrupt edaphic variation, two main gradients explain 24% of the  
419 total variation in tree community composition: one from the Guiana Shield to the southwestern  
420 Amazon, congruent with variation in soil fertility and its effects on tree wood density and seed  
421 mass, and another gradient from Colombia to the southeastern Amazon related to the length of  
422 the dry season (ter Steege *et al.* 2006). These gradients have distinctions in terms of their most  
423 abundant genera and occurrence of the Fabaceae family, which contains most of the large trees and  
424 grow successfully in low-dynamics environments such as the Guiana Shields. Higher occurrence  
425 of the Fabaceae in these low-fertility soils may occur due to the ability to fix nitrogen in the soil  
426 and ectomycorrhizal association (Webb & Sprent 2002; Sprent 2009).

427 Our results also demonstrate mean annual precipitation as a key factor for trees to grow taller. A tol-  
428 erance curve associated the height of tall trees with precipitation, peaking at 2,300 mm yr<sup>-1</sup> as op-  
429 timal, but also showing that areas too dry or too wet may both inhibit the growth of tall trees. Thus,  
430 we observed 4 m decline in maximum tree height in regions with annual precipitations below 1,500  
431 mm yr<sup>-1</sup> or above 3,000 mm yr<sup>-1</sup>. The availability of soil water depends on both precipitation and  
432 evapotranspiration, and our results suggest that below 1,500 mm yr<sup>-1</sup> evapotranspiration may ex-  
433 ceed precipitation in the Amazon (Scheffer *et al.* 2018), and mortality by the hydraulic failure may  
434 occur for trees near their maximum height (McDowell *et al.* 2008). Mean annual precipitation  
435 above 2,300 mm year<sup>-1</sup> may be related to exceeding water, and the combination of high precip-  
436 itation and poorly drained soils may result in anaerobic conditions with negative effects on tree  
437 growth and survival (Quesada *et al.* 2009). Furthermore, higher precipitation tends to be related to  
438 the occurrence of storms and stronger winds with increases in tree mortality (Aleixo *et al.* 2019).

439 Temperature and precipitation are key variables modulating the composition of species in the north-  
440 western to southeastern seasonality gradient (ter Steege *et al.* 2006). The mean precipitation in the  
441 Brazilian Amazon varies from less than 2,000 mm year<sup>-1</sup> (in the south, east, and extreme north) to  
442 more than 3,000 mm year<sup>-1</sup> (in the northwest) (Liebmann & Marengo 2001). The annual convective  
443 movement of the inter-tropical convergence zone results in distinct wet and dry seasons (Marengo  
444 & Nobre 2001). However, the dry season in the Amazon basin varies from virtually nonexistent  
445 to periods reaching up to seven consecutive months with less than 100 mm month<sup>-1</sup> of rain (Som-  
446 broek 2001). A global analysis provided evidence for the control of water availability over forest  
447 canopy height around the world, but the predictability between wet/dry indicates the involvement  
448 of additional limiting factors as temperature or radiation (Klein *et al.* 2015).

## 449 **Conclusion**

450 Plant size distributions can be understood as the demographic consequence of size-dependent vari-  
451 ation in growth and mortality in old-growth forests, and the mortality of large trees is independent  
452 of resource availability and competition (Coomes *et al.* 2003). Understanding the spatial dis-  
453 tribution of maximum tree height in tropical forests and how it is associated with environmental  
454 conditions and tree functional traits is of fundamental importance. Emergent trees that reach their  
455 maximum height are responsible for a significant amount of the transpired water flux and the above-  
456 ground carbon storage. Trees which reach these extraordinary heights are rare and only a small  
457 proportion of species have the necessary adaptations to achieve this. However, these adaptations are  
458 not sufficient alone, and maximum tree height is strongly influenced by environmental conditions.  
459 We found that, across the Brazilian Amazon, the most important conditions were a lower number  
460 of clear sky days (reducing stress from direct sunlight), and soil clay content (improving water  
461 retention). Our second analysis emphasized the importance of disturbance, showing that the tallest  
462 trees are only found in places with low wind speed, allowing trees to grow for centuries without  
463 substantial damage.

464 Current climate models differ in their predictions of large-scale changes in wind patterns, although  
465 warmer temperatures will mean that the air can hold more moisture, which will likely make con-  
466 vective storms more intense. Whatever the change in environmental conditions, it is likely to occur  
467 faster than trees can adapt. Our results showed that precipitation and temperature have a lower  
468 importance than expected from previous studies. Nevertheless, changes in the precipitation and  
469 radiation regimes (strongly linked to the number of cloudy days) could reshape our forest biomes.  
470 Ultimately, the association between environmental conditions and mechanisms of natural selec-  
471 tion, where some traits have some advantages in comparison to others influencing the survival of  
472 the most adaptable, are key to understanding the complexity of this process in a changing climate.

## 473 **Acknowledgements**

474 Funding was provided by the Coordenação de Aperfeiçoamento de Pessoal de Nível Superi-  
475 or Brasil (CAPES; Finance Code 001); Conselho Nacional de Desenvolvimento Científico e  
476 Tecnológico (Processes 403297/2016-8 and 301661/2019-7); Amazon Fund (grant 14.2.0929.1);  
477 National Academy of Sciences and US Agency for International Development (grant AID-OAA-  
478 A-11-00012); Universidade Federal dos Vales do Jequitinhonha e Mucuri (UFVJM); Instituto  
479 Nacional de Pesquisas Espaciais (INPE);

480 D. Almeida was supported by the São Paulo Research Foundation (#2018/21338-3 and  
481 #2019/14697-0);

482 B. Gimenez, G. Spanner and N. Higuchi were supported by INCT-Madeiras da Amazônia and  
483 Next Generation Ecosystem Experiments-Tropics (NGEE-Tropics), as part of DOE's Terrestrial  
484 Ecosystem Science Program – Contract No. DE-AC02-05CH11231;

485 T. Jackson and D. Coomes were supported by the UK Natural Environment Research Council grant  
486 NE/S010750/1;

487 M. Nunes was supported by the Academy of Finland (decision number 319905);

488 J. Rosette was supported by the Royal Society University Research Fellowship (URF\R\191014);

## 489 **Author contributions**

490 EBG, TJ, DC, MK, NH, MHN, JO conceived of the idea. EBG, MA, GS, FSP, AZM developed  
491 the analysis and performed the computations. EBG, MHN, TJ, MK, DV, RV, NH, CRR, RC, DAA,  
492 JR, BG, JO verified the results, interpreted the results, and wrote the manuscript.

## 493 **Competing interests**

494 The authors have no conflicts to declare.

## 495 **References**

496 Abatzoglou, J.T., Dobrowski, S.Z., Parks, S.A. & Hegewisch, K.C. (2018). TerraClimate a high-  
497 resolution global dataset of monthly climate and climatic water balance from 1958–2015. *Scientific*  
498 *Data*, 5.

499 Albergel, C., Dutra, E., Bonan, B., Zheng, Y., Munier, S., Balsamo, G., *et al.*. (2019). Monitoring  
500 and Forecasting the Impact of the 2018 Summer Heatwave on Vegetation. *Remote Sensing*, 11,  
501 520.

502 Albrecht, R.I., Goodman, S.J., Buechler, D.E., Blakeslee, R.J. & Christian, H.J. (2016). Where  
503 Are the Lightning Hotspots on Earth?. *Bulletin of the American Meteorological Society*, 97,  
504 2051–2068.

505 Aleixo, I., Norris, D., Hemerik, L., Barbosa, A., Prata, E., Costa, F., *et al.*. (2019). Amazo-  
506 nian rainforest tree mortality driven by climate and functional traits. *Nature Climate Change*, 9,  
507 384–388.

508 Almeida, C.T., Galvão, L.S., Ometto, J.P.H.B., Jacon, A.D., Souza Pereira, F.R. de, Sato, L.Y.,  
509 *et al.*. (2019). Combining LiDAR and hyperspectral data for aboveground biomass modeling in  
510 the Brazilian Amazon using different regression algorithms. *Remote Sensing of Environment*, 232,  
511 111323.

512 Almeida, D.R.A., Stark, S.C., Schiatti, J., Camargo, J.L.C., Amazonas, N.T., Gorgens, E.B., *et al.*.  
513 (2019). Persistent effects of fragmentation on tropical rainforest canopy structure after 20 yr of

514 isolation. *Ecological Applications*, 29.

515 Anderegg, W.R.L., Klein, T., Bartlett, M., Sack, L., Pellegrini, A.F.A., Choat, B., *et al.*. (2016).

516 Meta-analysis reveals that hydraulic traits explain cross-species patterns of drought-induced tree

517 mortality across the globe. *Proceedings of the National Academy of Sciences*, 113, 5024–5029.

518 Arsanjani, J.J., Vaz, E., Bakillah, M. & Mooney, P. (2014). Towards initiating OpenLandMap

519 founded on citizens' science: The current status of land use features of OpenStreetMap in Europe.

520 Asner, G.P. (2009). Tropical forest carbon assessment: integrating satellite and airborne mapping

521 approaches. *Environmental Research Letters*, 4, 034009.

522 Asner, G.P., Anderson, C.B., Martin, R.E., Tupayachi, R., Knapp, D.E. & Sinca, F. (2015). Land-

523 scape biogeochemistry reflected in shifting distributions of chemical traits in the Amazon forest

524 canopy. *Nature Geoscience*, 8, 567–573.

525 Asner, G.P., Powell, G.V.N., Mascaró, J., Knapp, D.E., Clark, J.K., Jacobson, J., *et al.*. (2010).

526 High-resolution forest carbon stocks and emissions in the Amazon. *Proceedings of the National*

527 *Academy of Sciences*, 107, 16738–16742.

528 Bae, S., Levick, S.R., Heidrich, L., Magdon, P., Leutner, B.F., Wöllauer, S., *et al.*. (2019). Radar

529 vision in the mapping of forest biodiversity from space. *Nature Communications*, 10.

530 Baker, T.R., Phillips, O.L., Malhi, Y., Almeida, S., Arroyo, L., Fiore, A.D., *et al.*. (2004). Variation

531 in wood density determines spatial patterns in Amazonian forest biomass. *Global Change Biology*,

532 10, 545–562.

533 Barkhordarian, A., Saatchi, S.S., Behrangi, A., Loikith, P.C. & Mechoso, C.R. (2019). A Recent

534 Systematic Increase in Vapor Pressure Deficit over Tropical South America. *Scientific Reports*, 9.

535 Bennett, A.C., McDowell, N.G., Allen, C.D. & Anderson-Teixeira, K.J. (2015). Larger trees suffer

536 most during drought in forests worldwide. *Nature Plants*, 1.

- 537 Bisht, G. & Bras, R.L. (2010). Estimation of net radiation from the MODIS data under all sky  
538 conditions: Southern Great Plains case study. *Remote Sensing of Environment*, 114, 1522–1534.
- 539 Bonnesoeur, V., Constant, T., Moulia, B. & Fournier, M. (2016). Forest trees filter chronic wind-  
540 signals to acclimate to high winds. *New Phytologist*, 210, 850–860.
- 541 Broedel, E., Tomasella, J., Cândido, L.A. & Randow, C. von. (2017). Deep soil water dynamics  
542 in an undisturbed primary forest in central Amazonia: Differences between normal years and the  
543 2005 drought. *Hydrological Processes*, 31, 1749–1759.
- 544 Cao, M. & Woodward, F.I.N. (1998). Net primary and ecosystem production and carbon stocks of  
545 terrestrial ecosystems and their responses to climate change. *Global Change Biology*, 4, 185–198.
- 546 Cerri, C.C. & Volkoff, B. (1987). Carbon content in a yellow latosol of central Amazon rain forest..  
547 *ACTA OECOL.(OECOL. GEN.)*, 8, 29–42.
- 548 Chave, J., Muller-Landau, H.C., Baker, T.R., Easdale, T.A., Steege, H.ter & Webb, C.O. (2006).  
549 Regional and phylogenetic variation of wood density across 2456 neotropical tree species. *Eco-  
550 logical applications*, 16, 2356–2367.
- 551 Chave, J., Piponiot, C., Maréchaux, I., de, F.H., Larpin, D., Fischer, F.J., *et al.* (2020). Slow rate  
552 of secondary forest carbon accumulation in the Guianas compared with the rest of the Neotropics..  
553 *Ecol Appl*, 30, e02004.
- 554 Claverie, M., Matthews, J., Vermote, E. & Justice, C. (2016). A 30+ Year AVHRR LAI and FAPAR  
555 Climate Data Record: Algorithm Description and Validation. *Remote Sensing*, 8, 263.
- 556 Condit, R. (2002). Beta-Diversity in Tropical Forest Trees. *Science*, 295, 666–669.
- 557 Coomes, D.A., Dalponte, M., Jucker, T., Asner, G.P., Banin, L.F., Burslem, D.F.R.P., *et al.* (2017).  
558 Area-based vs tree-centric approaches to mapping forest carbon in Southeast Asian forests from  
559 airborne laser scanning data. *Remote Sensing of Environment*, 194, 77–88.



- 560 Coomes, D.A., Duncan, R.P., Allen, R.B. & Truscott, J. (2003). Disturbances prevent stem size-  
561 density distributions in natural forests from following scaling relationships. *Ecology Letters*, 6,  
562 980–989.
- 563 Coomes, D.A., Jenkins, K.L. & Cole, L.E.S. (2006). Scaling of tree vascular transport systems  
564 along gradients of nutrient supply and altitude. *Biology Letters*, 3, 87–90.
- 565 Cosme, L.H.M., Schiatti, J., Costa, F.R.C. & Oliveira, R.S. (2017). The importance of hydraulic  
566 architecture to the distribution patterns of trees in a central Amazonian forest. *New Phytologist*,  
567 215, 113–125.
- 568 Dalponte, M. & Coomes, D.A. (2016). Tree-centric mapping of forest carbon density from air-  
569 borne laser scanning and hyperspectral data. *Methods in Ecology and Evolution*, 7, 1236–1245.
- 570 Drake, J.E., Tjoelker, M.G., Vårhammar, A., Medlyn, B.E., Reich, P.B., Leigh, A., *et al.* (2018).  
571 Trees tolerate an extreme heatwave via sustained transpirational cooling and increased leaf thermal  
572 tolerance. *Global Change Biology*, 24, 2390–2402.
- 573 Díaz, S., Kattge, J., Cornelissen, J.H.C., Wright, I.J., Lavorel, S., Dray, S., *et al.* (2016). The  
574 global spectrum of plant form and function. *Nature*, 529, 167–171.
- 575 Enquist, B.J., Abraham, A.J., Harfoot, M.B.J., Malhi, Y. & Doughty, C.E. (2020). The megabiota  
576 are disproportionately important for biosphere functioning. *Nature Communications*, 11.
- 577 Espírito-Santo, F.D.B., Gloor, M., Keller, M., Malhi, Y., Saatchi, S., Nelson, B., *et al.* (2014).  
578 Size and frequency of natural forest disturbances and the Amazon forest carbon balance. *Nature*  
579 *communications*, 5, 1–6.
- 580 Farr, T.G., Rosen, P.A., Caro, E., Crippen, R., Duren, R., Hensley, S., *et al.* (2007). The shuttle  
581 radar topography mission. *Reviews of geophysics*, 45.
- 582 Fauset, S., Johnson, M.O., Gloor, M., Baker, T.R., Monteagudo, M.A., Brienen, R.J., *et al.* (2015).

- 583 Hyperdominance in Amazonian forest carbon cycling.. *Nat Commun*, 6, 6857.
- 584 Feldpausch, T.R., Lloyd, J., Lewis, S.L., Brien, R.J.W., Gloor, M., Monteagudo Mendoza, A.,  
585 *et al.*. (2012). Tree height integrated into pantropical forest biomass estimates. *Biogeosciences*,  
586 3381–3403.
- 587 Ferraz, J., Ohta, S.A.L.L.E.S. & Sales, P.C.de. (1998). Distribuição dos solos ao longo de dois  
588 transectos em floresta primária ao norte de Manaus (AM). *Higuchi, N., Campos, MAA, Sampaio,*  
589 *PTB, and dos Santos, J., Espaço Comunicação Ltda., Manaus, Brazil*, 264.
- 590 Fick, S.E. & Hijmans, R.J. (2017). WorldClim 2: new 1-km spatial resolution climate surfaces for  
591 global land areas. *International Journal of Climatology*, 37, 4302–4315.
- 592 Fisher, R.A., Williams, M., Lourdes Ruivo, M. de, Costa, A.L. de & Meir, P. (2008). Evaluating  
593 climatic and soil water controls on evapotranspiration at two Amazonian rainforest sites. *Agricul-*  
594 *tural and Forest Meteorology*, 148, 850–861.
- 595 Funk, C., Peterson, P., Landsfeld, M., Pedreros, D., Verdin, J., Shukla, S., *et al.*. (2015). The  
596 climate hazards infrared precipitation with stations—a new environmental record for monitoring  
597 extremes. *Scientific Data*, 2.
- 598 Fyllas, N.M., Patiño, S., Baker, T.R., Nardoto, G.B., Martinelli, L.A., Quesada, C.A., *et al.*. (2009).  
599 Basin-wide variations in foliar properties of Amazonian forest: phylogeny soils and climate. *Bio-*  
600 *geosciences*, 6, 2677–2708.
- 601 Fyllas, N.M., Quesada, C.A. & Lloyd, J. (2012). Deriving Plant Functional Types for Amazo-  
602 nian forests for use in vegetation dynamics models. *Perspectives in Plant Ecology Evolution and*  
603 *Systematics*, 14, 97–110.
- 604 Givnish, T.J., Wong, S.C., Stuart-Williams, H., Holloway-Phillips, M. & Farquhar, G.D. (2014).  
605 Determinants of maximum tree height in Eucalyptus species along a rainfall gradient in Victoria

606 Australia. *Ecology*, 95, 2991–3007.

607 Gorgens, E.B., Motta, A.Z., Assis, M., Nunes, M.H., Jackson, T., Coomes, D., *et al.*. (2019). The  
608 giant trees of the Amazon basin. *Frontiers in Ecology and the Environment*, 17, 373–374.

609 Greenwood, S., Ruiz-Benito, P., Martínez-Vilalta, J., Lloret, F., Kitzberger, T., Allen, C.D., *et al.*.  
610 (2017). Tree mortality across biomes is promoted by drought intensity lower wood density and  
611 higher specific leaf area. *Ecology Letters*, 20, 539–553.

612 Gu, L. (2003). Response of a Deciduous Forest to the Mount Pinatubo Eruption: Enhanced Pho-  
613 tosynthesis. *Science*, 299, 2035–2038.

614 Görgens, E.B., Soares, C.P.B., Nunes, M.H. & Rodriguez, L.C.E. (2016). Characterization of  
615 Brazilian forest types utilizing canopy height profiles derived from airborne laser scanning. *Ap-  
616 plied Vegetation Science*, 19, 518–527.

617 Hacke, U.G., Sperry, J.S., Pockman, W.T., Davis, S.D. & McCulloh, K.A. (2001). Trends in wood  
618 density and structure are linked to prevention of xylem implosion by negative pressure. *Oecologia*,  
619 126, 457–461.

620 Hamilton, S.K., Kellndorfer, J., Lehner, B. & Tobler, M. (2007). Remote sensing of floodplain  
621 geomorphology as a surrogate for biodiversity in a tropical river system (Madre de Dios Peru).  
622 *Geomorphology*, 89, 23–38.

623 Higgins, M.A., Ruokolainen, K., Tuomisto, H., Llerena, N., Cardenas, G., Phillips, O.L., *et al.*.  
624 (2011). Geological control of floristic composition in Amazonian forests. *Journal of Biogeogra-  
625 phy*, 38, 2136–2149.

626 Hijmans, R.J., Cameron, S.E., Parra, J.L., Jones, P.G. & Jarvis, A. (2005). Very high resolu-  
627 tion interpolated climate surfaces for global land areas. *International Journal of Climatology*, 25,  
628 1965–1978.

- 629 Hodnett, M.G., Vendrame, I., Marques Filho, A.D.O., Oyama, M.D. & Tomasella, J. (1997). Soil  
630 water storage and groundwater behaviour in a catenary sequence beneath forest in central Amazo-  
631 nia: I. Comparisons between plateau, slope and valley floor. *Hydrology and Earth System Sciences*  
632 *Discussions*, 1.
- 633 Huete, A.R., Didan, K., Shimabukuro, Y.E., Ratana, P., Saleska, S.R., Hutyrá, L.R., *et al.* (2006).  
634 Amazon rainforests green-up with sunlight in dry season. *Geophysical Research Letters*, 33.
- 635 Jagels, R., Equiza, M.A., Maguire, D.A. & Cirelli, D. (2018). Do tall tree species have higher  
636 relative stiffness than shorter species?. *American Journal of Botany*, 105, 1617–1630.
- 637 Kang, S., Running, S.W., Zhao, M., Kimball, J.S. & Glassy, J. (2005). Improving continuity  
638 of MODIS terrestrial photosynthesis products using an interpolation scheme for cloudy pixels.  
639 *International Journal of Remote Sensing*, 26, 1659–1676.
- 640 Klein, T., Randin, C. & Körner, C. (2015). Water availability predicts forest canopy height at the  
641 global scale. *Ecology Letters*, 18, 1311–1320.
- 642 Koch, G.W., Sillett, S.C., Jennings, G.M. & Davis, S.D. (2004). The limits to tree height. *Nature*,  
643 428, 851–854.
- 644 Larjavaara, M. (2013). The world's tallest trees grow in thermally similar climates. *New Phytolo-*  
645 *gist*, 202, 344–349.
- 646 Laurance, W.F., Fearnside, P.M., Laurance, S.G., Delamonica, P., Lovejoy, T.E., Merona, J.M.R.-  
647 de, *et al.* (1999). Relationship between soils and Amazon forest biomass: a landscape-scale study.  
648 *Forest Ecology and Management*, 118, 127–138.
- 649 Liebmann, B. & Marengo, J.A. (2001). Interannual variability of the rainy season and rainfall in  
650 the Brazilian Amazon Basin. *Journal of Climate*, 14, 4308–4318.
- 651 Lindenmayer, D.B. & Laurance, W.F. (2016). The Unique Challenges of Conserving Large Old

- 652 Trees. *Trends in Ecology & Evolution*, 31, 416–418.
- 653 Liu, H., Gleason, S.M., Hao, G., Hua, L., He, P., Goldstein, G., *et al.*. (2019). Hydraulic traits are  
654 coordinated with maximum plant height at the global scale. *Science Advances*, 5, eaav1332.
- 655 Liu, J.-kuan, Liu, D. & Alsdorf, D. (2014). Extracting Ground-Level DEM From SRTM DEM in  
656 Forest Environments Based on Mathematical Morphology. *IEEE Transactions on Geoscience and*  
657 *Remote Sensing*, 52, 6333–6340.
- 658 Malhi, Y., Baker, T.R., Phillips, O.L., Almeida, S., Alvarez, E., Arroyo, L., *et al.*. (2004). The  
659 above-ground coarse wood productivity of 104 Neotropical forest plots. *Global Change Biology*,  
660 10, 563–591.
- 661 Malhi, Y., Wood, D., Baker, T.R., Wright, J., Phillips, O.L., Cochrane, T., *et al.*. (2006). The  
662 regional variation of aboveground live biomass in old-growth Amazonian forests. *Global Change*  
663 *Biology*, 12, 1107–1138.
- 664 Marengo, J.A. & Nobre, C. (2001). General Characteristics and variability of Climate in the Ama-  
665 zon Basin and its Links to the Global Climate System. In: *The hydroclimatological framework of*  
666 *Amazonia, Biogeochemistry of Amazonia*. Cambridge University Press.
- 667 Marques, J.D.de O., Libardi, P.L., Teixeira, W.G. & Reis, A.M. (2004). Estudo de parâmetros  
668 físicos, químicos e hídricos de um Latossolo Amarelo, na região Amazônica. *Acta amazônica*, 34,  
669 145–154.
- 670 Marques, J.D.de O., Luizão, F.J., Teixeira, W.G., Sarrazin, M., Ferreira, S.J.F., Beldini, T.P., *et*  
671 *al.*. (2015). Distribution of organic carbon in different soil fractions in ecosystems of central  
672 Amazonia. *Revista Brasileira de Ciência do Solo*, 39, 232–242.
- 673 Marques, J.J., Teixeira, W.G., Schulze, D.G. & Curi, N. (2002). Mineralogy of soils with unusually  
674 high exchangeable Al from the western Amazon Region. *Clay Minerals*, 37, 651–661.

- 675 Marra, D.M., Chambers, J.Q., Higuchi, N., Trumbore, S.E., Ribeiro, G.H.P.M., Santos, J. dos, *et*  
676 *al.* (2014). Large-Scale Wind Disturbances Promote Tree Diversity in a Central Amazon Forest.  
677 *PLoS ONE*, 9, e103711.
- 678 Marvin, D.C., Asner, G.P., Knapp, D.E., Anderson, C.B., Martin, R.E., Sinca, F., *et al.* (2014).  
679 Amazonian landscapes and the bias in field studies of forest structure and biomass. *Proceedings of*  
680 *the National Academy of Sciences*, 111, E5224–E5232.
- 681 Mason, P.J., Zillman, J.W., Simmons, A., Lindstrom, E.J., Harrison, D.E., Dolman, H., *et al.*  
682 (2010). Implementation plan for the global observing system for climate in support of the UN-  
683 FCCC (2010 Update).
- 684 McDowell, N., Allen, C.D., Anderson-Teixeira, K., Brando, P., Brien, R., Chambers, J., *et al.*  
685 (2018). Drivers and mechanisms of tree mortality in moist tropical forests. *New Phytologist*, 219,  
686 851–869.
- 687 McDowell, N., Pockman, W.T., Allen, C.D., Breshears, D.D., Cobb, N., Kolb, T., *et al.* (2008).  
688 Mechanisms of plant survival and mortality during drought: why do some plants survive while  
689 others succumb to drought?. *New Phytologist*, 178, 719–739.
- 690 McDowell, N.G. & Allen, C.D. (2015). Darcy's law predicts widespread forest mortality under  
691 climate warming. *Nature Climate Change*, 5, 669–672.
- 692 Moles, A.T., Warton, D.I., Warman, L., Swenson, N.G., Laffan, S.W., Zanne, A.E., *et al.* (2009).  
693 Global patterns in plant height. *Journal of Ecology*, 97, 923–932.
- 694 Morrone, J.J. (2014). Biogeographical regionalisation of the Neotropical region. *Zootaxa*, 3782,  
695 1.
- 696 Morton, D.C., Nagol, J., Carabajal, C.C., Rosette, J., Palace, M., Cook, B.D., *et al.* (2014).  
697 Amazon forests maintain consistent canopy structure and greenness during the dry season. *Nature*,

698 506, 221–224.

699 Muller-Landau, H.C. (2004). Interspecific and Inter-site Variation in Wood Specific Gravity of  
700 Tropical Trees. *Biotropica*, 36, 20–32.

701 Negrón-Juárez, R.I., Jenkins, H.S., Raupp, C.F.M., Riley, W.J., Kueppers, L.M., Magnabosco  
702 Marra, D., *et al.*. (2017). Windthrow Variability in Central Amazonia. *Atmosphere*, 8.

703 Niklas, K.J. (2007). Maximum plant height and the biophysical factors that limit it. *Tree Physiol-*  
704 *ogy*, 27, 433–440.

705 Niklas, K.J. (1998). The influence of gravity and wind on land plant evolution. *Review of Palaeob-*  
706 *otany and Palynology*, 102, 1–14.

707 Nunes, M.H., Both, S., Bongalov, B., Brelsford, C., Khoury, S., Burslem, D.F.R.P., *et al.*. (2019).  
708 Changes in leaf functional traits of rainforest canopy trees associated with an El Niño event in  
709 Borneo. *Environmental Research Letters*, 14, 085005.

710 Olauson, J. (2018). ERA5: The new champion of wind power modelling?. *Renewable Energy*,  
711 126, 322–331.

712 Patiño, S., Fyllas, N.M., Baker, T.R., Paiva, R., Quesada, C.A., Santos, A.J.B., *et al.*. (2012).  
713 Coordination of physiological and structural traits in Amazon forest trees. *Biogeosciences*, 9,  
714 775–801.

715 Pennisi, E. (2019). Forest giants are the trees most at risk. *Science*, 365, 962–963.

716 Pereira, I., Nascimento, H.M. do, Vicari, M.B., Disney, M., DeLucia, E., Domingues, T., *et al.*.  
717 (2019). Performance of Laser-Based Electronic Devices for Structural Analysis of Amazonian  
718 Terra-Firme Forests. *Remote Sensing*, 11, 510.

719 Phillips, O.L., Baker, T.R., Arroyo, L., Higuchi, N., Killeen, T.J., Laurance, W.F., *et al.*. (2004).  
720 Pattern and process in Amazon tree turnover, 1976–2001. *Philosophical Transactions of the Royal*

- 721 *Society of London. Series B: Biological Sciences*, 359, 381–407.
- 722 Phillips, O.L., Vargas, P.N., Monteagudo, A.L., Cruz, A.P., Zans, M.-E.C., Sánchez, W.G., *et al.*  
723 (2003). Habitat association among Amazonian tree species: a landscape-scale approach. *Journal*  
724 *of Ecology*, 91, 757–775.
- 725 Phillips, S.J., Anderson, R.P. & Schapire, R.E. (2006). Maximum entropy modeling of species  
726 geographic distributions. *Ecological Modelling*, 190, 231–259.
- 727 Pitman, N.C.A., Terborgh, J.W., Silman, M.R., Núñez V, P., Neill, D.A., Cerón, C.E., *et al.* (2001).  
728 Dominance and distribution of tree species in upper Amazonian terra firme forests. *Ecology*, 82,  
729 2101–2117.
- 730 Poorter, L. & Bongers, F. (2006). Leaf traits are good predictors of plant performance across 53  
731 rain forest species. *Ecology*, 87, 1733–1743.
- 732 Powers, J.S., Vargas-G, G., Brodribb, T.J., Schwartz, N.B., Perez-Aviles, D., Smith-Martin, C.M.,  
733 *et al.* (2020). A catastrophic tropical drought kills hydraulically vulnerable tree species. *Global*  
734 *Change Biology*.
- 735 Quesada, C.A., Lloyd, J., Anderson, L.O., Fyllas, N.M., Schwarz, M. & Czimczik, C.I. (2011).  
736 Soils of Amazonia with particular reference to the RAINFOR sites. *Biogeosciences*, 8, 1415–1440.
- 737 Quesada, C.A., Lloyd, J., Schwarz, M., Baker, T.R., Phillips, O.L., Patiño, S., *et al.* (2009). Re-  
738 gional and large-scale patterns in Amazon forest structure and function are mediated by variations  
739 in soil physical and chemical properties. *Biogeosciences Discussion*, 6, 3993–4057.
- 740 Quesada, C.A., Phillips, O.L., Schwarz, M., Czimczik, C.I., Baker, T.R., Patiño, S., *et al.* (2012).  
741 Basin-wide variations in Amazon forest structure and function are mediated by both soils and  
742 climate. *Biogeosciences*, 9, 2203–2246.
- 743 Ramon, J., Lledó, L., Torralba, V., Soret, A. & Doblás-Reyes, F.J. (2019). What global reanalysis



- 744 best represents near-surface winds?. *Quarterly Journal of the Royal Meteorological Society*, 145,  
745 3236–3251.
- 746 Rifai, S.W., Urquiza Muñoz, J.D., Negrón-Juárez, R.I., Ramírez Arévalo, F.R., Tello-Espinoza, R.,  
747 Vanderwel, M.C., *et al.*. (2016). Landscape-scale consequences of differential tree mortality from  
748 catastrophic wind disturbance in the Amazon. *Ecological Applications*, 26, 2225–2237.
- 749 Rowland, L., Costa, A.C.L. da, Galbraith, D.R., Oliveira, R.S., Binks, O.J., Oliveira, A.A.R., *et*  
750 *al.*. (2015). Death from drought in tropical forests is triggered by hydraulics not carbon starvation.  
751 *Nature*, 528, 119–122.
- 752 Rueda, M., Godoy, O. & Hawkins, B.A. (2016). Spatial and evolutionary parallelism between  
753 shade and drought tolerance explains the distributions of conifers in the conterminous United  
754 States. *Global Ecology and Biogeography*, 26, 31–42.
- 755 Ruhoff, A.L., Paz, A.R., Collischonn, W., Aragao, L.E.O.C., Rocha, H.R. & Malhi, Y.S. (2012).  
756 A MODIS-Based Energy Balance to Estimate Evapotranspiration for Clear-Sky Days in Brazilian  
757 Tropical Savannas. *Remote Sensing*, 4, 703–725.
- 758 Sakschewski, B., Bloh, W. von, Boit, A., Poorter, L., Peña-Claros, M., Heinke, J., *et al.*. (2016).  
759 Resilience of Amazon forests emerges from plant trait diversity. *Nature Climate Change*, 6,  
760 1032–1036.
- 761 Santos, E.G.D., Shimabukuro, Y.E., Moura, Y.M.D., Gonçalves, F.G., Jorge, A., Gasparini, K.A.,  
762 *et al.*. (2019). Multi-scale approach to estimating aboveground biomass in the Brazilian Amazon  
763 using Landsat and LiDAR data. *International Journal of Remote Sensing*, 40, 8635–8645.
- 764 Scheffer, M., Xu, C., Hantson, S., Holmgren, M., Los, S.O. & Nes, E.H. van. (2018). A global  
765 climate niche for giant trees. *Global Change Biology*, 24, 2875–2883.
- 766 Schiatti, J., Emilio, T., Rennó, C.D., Drucker, D.P., Costa, F.R.C., Nogueira, A., *et al.*. (2013).

- 767 Vertical distance from drainage drives floristic composition changes in an Amazonian rainforest.  
768 *Plant Ecology & Diversity*, 7, 241–253.
- 769 Schimel, D., Pavlick, R., Fisher, J.B., Asner, G.P., Saatchi, S., Townsend, P., *et al.* (2015).  
770 Observing terrestrial ecosystems and the carbon cycle from space. *Global Change Biology*, 21,  
771 1762–1776.
- 772 Simard, M., Fatoyinbo, L., Smetanka, C., Rivera-Monroy, V.H., Castañeda-Moya, E., Thomas, N.,  
773 *et al.* (2018). Mangrove canopy height globally related to precipitation temperature and cyclone  
774 frequency. *Nature Geoscience*, 12, 40–45.
- 775 Sombroek, W. (2001). Spatial and Temporal Patterns of Amazon Rainfall. *AMBIO: A Journal of*  
776 *the Human Environment*, 30, 388–396.
- 777 Sprent, J.I. (2009). *Legume Nodulation*. Wiley-Blackwell.
- 778 Stovall, A.E.L., Shugart, H. & Yang, X. (2019). Tree height explains mortality risk during an  
779 intense drought. *Nature Communications*, 10.
- 780 Stropp, J., Umbelino, B., Correia, R.A., Campos-Silva, J.V., Ladle, R.J. & Malhado, A.C.M.  
781 (2020). The ghosts of forests past and future: deforestation and botanical sampling in the Brazilian  
782 Amazon. *Ecography*.
- 783 Tao, X., Liang, S., He, T. & Jin, H. (2016). Estimation of fraction of absorbed photosynthetically  
784 active radiation from multiple satellite data: Model development and validation. *Remote Sensing*  
785 *of Environment*, 184, 539–557.
- 786 Tejada, G., Görgens, E.B., Espírito-Santo, F.D.B., Cantinho, R.Z. & Ometto, J.P. (2019). Evalu-  
787 ating spatial coverage of data on the aboveground biomass in undisturbed forests in the Brazilian  
788 Amazon. *Carbon Balance and Management*, 14.
- 789 Telewski, F.W. (2006). A unified hypothesis of mechanoperception in plants. *American Journal of*

790 *Botany*, 93, 1466–1476.

791 Terborgh, J. & Andresen, E. (1998). The composition of Amazonian forests: patterns at local and  
792 regional scales. *Journal of Tropical Ecology*, 14, 645–664.

793 Toledo, J.J., Castilho, C.V., Magnusson, W.E. & Nascimento, H.E.M. (2016). Soil controls  
794 biomass and dynamics of an Amazonian forest through the shifting of species and traits. *Brazilian*  
795 *Journal of Botany*, 40, 451–461.

796 Tuomisto, H., doninck, J.V., Ruokolainen, K., Moulatlet, G.M., Figueiredo, F.O.G., Sirén, A.,  
797 *et al.*. (2019). Discovering floristic and geocological gradients across Amazonia. *Journal of*  
798 *Biogeography*, 46, 1734–1748.

799 Webb, J.R. & Sprent, J.I. (2002). Nodulation in Legumes. *Kew Bulletin*, 57, 634.

800 Williams, A.P., Allen, C.D., Macalady, A.K., Griffin, D., Woodhouse, C.A., Meko, D.M., *et al.*.  
801 (2012). Temperature as a potent driver of regional forest drought stress and tree mortality. *Nature*  
802 *Climate Change*, 3, 292–297.

803 Wright, I.J., Reich, P.B., Westoby, M., Ackerly, D.D., Baruch, Z., Bongers, F., *et al.*. (2004). The  
804 worldwide leaf economics spectrum.. *Nature*, 428, 821–7.

805 Yang, Y., Saatchi, S., Xu, L., Yu, Y., Lefsky, M., White, L., *et al.*. (2016). Abiotic Controls on  
806 Macroscale Variations of Humid Tropical Forest Height. *Remote Sensing*, 8, 494.

807 Yanoviak, S.P., Gora, E.M., Bitzer, P.M., Burchfield, J.C., Muller-Landau, H.C., Detto, M., *et al.*.  
808 (2019). Lightning is a major cause of large tree mortality in a lowland neotropical forest. *New*  
809 *Phytologist*, 225, 1936–1944.

810 Steege, H. ter, Pitman, N.C.A., Phillips, O.L., Chave, J., Sabatier, D., Duque, A., *et al.*. (2006).  
811 Continental-scale patterns of canopy tree composition and function across Amazonia. *Nature*, 443,  
812 444–447.

- 813 Gelder, H.A. van, Poorter, L. & Sterck, F.J. (2006). Wood mechanics allometry, and life-history  
814 variation in a tropical rain forest tree community. *New Phytologist*, 171, 367–378.

815 **Tables**

|                   | fa-<br>par | srtm | us-<br>speed | vspeed | clear-<br>Days | days20 | light-<br>ning | month100 | pan-<br>nual | pdri-<br>est | pet  | psea-<br>son | pwettest | tan-<br>nual | tsea-<br>son | tmax | clay-<br>Con-<br>tent | water-<br>Content |
|-------------------|------------|------|--------------|--------|----------------|--------|----------------|----------|--------------|--------------|------|--------------|----------|--------------|--------------|------|-----------------------|-------------------|
| fapar             | 1          | 0.14 | 0.1          | 0.15   | 0.08           | 0.01   | 0.17           | -0.21    | 0.12         | 0.09         | -    | -            | -        | -            | -            | -    | 0.01                  | 0.11              |
|                   |            |      |              |        |                |        |                |          |              |              | 0.28 | 0.18         | 0.06     | 0.17         | 0.06         | 0.03 |                       |                   |
| srtm              | 0.14       | 1    | 0.44         | 0.27   | 0.6            | -      | -0.03          | 0.45     | -            | -            | 0.28 | 0.5          | -0.1     | -            | 0.51         | 0.41 | -0.18                 | 0.29              |
|                   |            |      |              |        |                | 0.28   |                |          | 0.41         | 0.53         |      |              |          | 0.74         |              |      |                       |                   |
| uspeed            | 0.1        | 0.44 | 1            | 0.67   | 0.73           | -      | 0.33           | 0.13     | -            | -            | -    | 0.32         | -        | -            | 0.42         | 0.5  | -0.56                 | 0.28              |
|                   |            |      |              |        |                | 0.25   |                |          | 0.19         | 0.36         | 0.05 |              | 0.13     | 0.48         |              |      |                       |                   |
| vspeed            | 0.15       | 0.27 | 0.67         | 1      | 0.56           | -      | 0.23           | -0.03    | -            | -            | -    | 0.17         | -        | -            | 0.33         | 0.31 | -0.42                 | 0.43              |
|                   |            |      |              |        |                | 0.42   |                |          | 0.11         | 0.34         | 0.46 |              | 0.24     | 0.49         |              |      |                       |                   |
| clear-<br>Days    | 0.08       | 0.6  | 0.73         | 0.56   | 1              | -      | 0.36           | 0.41     | -            | -            | 0.2  | 0.54         | -        | -0.5         | 0.53         | 0.78 | -0.48                 | 0.39              |
|                   |            |      |              |        |                | 0.47   |                |          | 0.37         | 0.62         |      |              | 0.11     |              |              |      |                       |                   |
| days20            | 0.01       | -    | -            | -      | -0.47          | 1      | -0.1           | -0.52    | 0.64         | 0.6          | 0.03 | -            | 0.4      | 0.3          | -            | -0.3 | 0.02                  | -0.31             |
|                   |            | 0.28 | 0.25         | 0.42   |                |        |                |          |              |              |      | 0.46         |          |              | 0.22         |      |                       |                   |
| light-<br>ning    | 0.17       | -    | 0.33         | 0.23   | 0.36           | -0.1   | 1              | -0.2     | 0.2          | 0.04         | -    | -            | -        | 0.07         | -            | 0.34 | -0.29                 | 0.01              |
|                   |            | 0.03 |              |        |                |        |                |          |              |              | 0.15 | 0.13         | 0.02     |              | 0.18         |      |                       |                   |
| month100          | -          | 0.45 | 0.13         | -      | 0.41           | -      | -0.2           | 1        | -            | -            | 0.63 | 0.89         | 0.04     | -            | 0.4          | 0.5  | 0.09                  | 0.18              |
|                   |            | 0.21 |              | 0.03   |                | 0.52   |                |          | 0.77         | 0.82         |      |              |          |              | 0.24         |      |                       |                   |
| pannual           | 0.12       | -    | -            | -      | -0.37          | 0.64   | 0.2            | -0.77    | 1            | 0.75         | -    | -            | 0.46     | 0.31         | -            | -    | -0.1                  | -0.2              |
|                   |            | 0.41 | 0.19         | 0.11   |                |        |                |          |              |              | 0.32 | 0.73         |          |              | 0.38         | 0.29 |                       |                   |
| pdriest           | 0.09       | -    | -            | -      | -0.62          | 0.6    | 0.04           | -0.82    | 0.75         | 1            | -    | -            | 0.05     | 0.45         | -            | -0.6 | 0.03                  | -0.35             |
|                   |            | 0.53 | 0.36         | 0.34   |                |        |                |          |              |              | 0.36 | 0.91         |          |              | 0.43         |      |                       |                   |
| pet               | -          | 0.28 | -            | -      | 0.2            | 0.03   | -0.15          | 0.63     | -            | -            | 1    | 0.58         | 0.4      | 0.08         | 0.25         | 0.48 | 0                     | -0.11             |
|                   |            | 0.28 |              | 0.05   | 0.46           |        |                |          | 0.32         | 0.36         |      |              |          |              |              |      |                       |                   |
| pseason           | -          | 0.5  | 0.32         | 0.17   | 0.54           | -      | -0.13          | 0.89     | -            | -            | 0.58 | 1            | 0.16     | -            | 0.43         | 0.6  | -0.04                 | 0.24              |
|                   |            | 0.18 |              |        |                | 0.46   |                |          | 0.73         | 0.91         |      |              |          | 0.38         |              |      |                       |                   |
| pwettest          | -          | -0.1 | -            | -      | -0.11          | 0.4    | -0.02          | 0.04     | 0.46         | 0.05         | 0.4  | 0.16         | 1        | 0.2          | -            | 0.19 | 0.06                  | -0.13             |
|                   |            | 0.06 |              | 0.13   | 0.24           |        |                |          |              |              |      |              |          |              | 0.12         |      |                       |                   |
| tannual           | -          | -    | -            | -      | -0.5           | 0.3    | 0.07           | -0.24    | 0.31         | 0.45         | 0.08 | -            | 0.2      | 1            | -0.4         | -    | 0.2                   | -0.33             |
|                   |            | 0.17 | 0.74         | 0.48   | 0.49           |        |                |          |              |              |      | 0.38         |          |              |              | 0.12 |                       |                   |
| tseason           | -          | 0.51 | 0.42         | 0.33   | 0.53           | -      | -0.18          | 0.4      | -            | -            | 0.25 | 0.43         | -        | -0.4         | 1            | 0.42 | -0.23                 | 0.21              |
|                   |            | 0.06 |              |        |                | 0.22   |                |          | 0.38         | 0.43         |      |              | 0.12     |              |              |      |                       |                   |
| tmax              | -          | 0.41 | 0.5          | 0.31   | 0.78           | -0.3   | 0.34           | 0.5      | -            | -0.6         | 0.48 | 0.6          | 0.19     | -            | 0.42         | 1    | -0.33                 | 0.21              |
|                   |            | 0.03 |              |        |                |        |                |          | 0.29         |              |      |              |          |              | 0.12         |      |                       |                   |
| clay-<br>Content  | 0.01       | -    | -            | -      | -0.48          | 0.02   | -0.29          | 0.09     | -0.1         | 0.03         | 0    | -            | 0.06     | 0.2          | -            | -    | 1                     | -0.13             |
|                   |            | 0.18 | 0.56         | 0.42   |                |        |                |          |              |              |      |              |          |              | 0.23         | 0.33 |                       |                   |
| water-<br>Content | 0.11       | 0.29 | 0.28         | 0.43   | 0.39           | -      | 0.01           | 0.18     | -0.2         | -            | -    | 0.24         | -        | -            | 0.21         | 0.21 | -0.13                 | 1                 |
|                   |            |      |              |        |                | 0.31   |                |          |              | 0.35         | 0.11 |              | 0.13     | 0.33         |              |      |                       |                   |

Table 1: Correlation between the environmental variables.

| Layer         | Definition                                               | Related to                                                                                         | Unit         | Source       | Importance                  |
|---------------|----------------------------------------------------------|----------------------------------------------------------------------------------------------------|--------------|--------------|-----------------------------|
| clearDays     | number of clear days per year                            | energy balance - water balance - radiation                                                         | days         | MODIS        | 14.7                        |
| clayContent   | fraction of clay content                                 | soil structure - physical properties - water availability                                          | %            | Open-LandMap | 13.8                        |
| topography    | elevation above sea level                                | distance to water - flooding zones - soil                                                          | m            | SRTM         | 11.2                        |
| pannual       | average annual precipitation                             | precipitation - precipitation intensity - precipitation distribution                               | mm           | WorldClim    | 8.9                         |
| pseason       | precipitation seasonality                                | precipitation - precipitation intensity - precipitation distribution                               | mm           | WorldClim    | 6.9                         |
| fapar         | fraction of absorbed photosynthetically active radiation | radiation - vegetation health - anthropic regions - soil exposure                                  | %            | NOAA AVHRR   | 6.3                         |
| pwettest      | precipitation of the wettest month                       | precipitation - precipitation intensity - precipitation distribution                               | mm           | WorldClim    | 5.8                         |
| uspeed        | zonal speed (W-E)                                        | storms - convective winds                                                                          | m/s          | ECM-RWF      | 5.6                         |
| days20        | days with precipitation higher then 20 mm                | storms - convective winds                                                                          | days         | CHIRPS       | 5.5                         |
| pet           | potential evapotranspiration                             | energy balance - water balance - radiation - vegetation health - anthropic regions - soil exposure | mm           | TerraClimate | 5.2                         |
| tseason       | temperature seasonality                                  | temperature - temperature distribution                                                             | C            | WorldClim    | 4.6                         |
| tmax          | maximum temperatura                                      | storms - convective winds                                                                          | C            | WorldClim    | 4.2                         |
| vspeed        | meridional speed (N-S)                                   | storms - convective winds                                                                          | m/s          | ECM-RWF      | 3.6                         |
| lightning     | lightning rate                                           | storms - convective winds                                                                          | flashes rate | LIS TRMM     | 3.5                         |
| tannual       | daily average annual temperature                         | temperature - temperature distribution                                                             | C            | WorldClim    | 0.3                         |
| water-Content | fraction of water content                                | soil structure - physical properties - water availability                                          | %            | Open-LandMap | 0                           |
| month100      | month with precipitation below 100 mm                    | precipitation - precipitation intensity - precipitation distribution                               | months       | CHIRPS       | Removed by high correlation |
| pdriest       | precipitation of the driest month                        | precipitation - precipitation intensity - precipitation distribution                               | mm           | WorldClim    | Removed by high correlation |

Table 2: Variables used to estimate maximum height distribution and evaluate its distribution, ranked by variable importance results in the Random Forest model

## 816 **Figure Captions**

Figure 1. Maps of the Brazilian Amazon showing the location of trees > 50 m, > 60 m, > 70 m, and > 80 m in height. Black circles indicate the presence of a tree above the height thresholds. Background color indicates the biogeographical subdivisions proposed by (Morrone 2014): I - Para; II - Xingu-Tapajos; III - Roraima; IV - Guianan Lowlands; V - Madeira; VI - Yungas; VII - Pantepui; VIII - Imeri.

Figure 2. Maximum height estimation based on remote sensing variables estimated by Random Forest method. Black lines indicate the biogeographical subdivisions: I - Para; II - Xingu-Tapajos; III - Roraima; IV - Guianan Lowlands; V - Madeira; VI - Yungas; VII - Pantepui; VIII - Imeri.

Figure 3. Maximum tree height distribution when FAPAR values under 80% were excluded from our analysis.

Figure 4. Marginal plot for each variable considering the Random Forest model for maximum height estimation

Figure 5. Marginal plot for each variable considering the Maximum Entropy model for niche determination

Figure 6. Occurrence of giant trees (black dots) and niche capability to support the development of tall trees (probability of tall tree occurrence). Black lines indicate the biogeographical subdivisions: I - Para; II - Xingu-Tapajos; III - Roraima; IV - Guianan Lowlands; V - Madeira; VI - Yungas; VII - Pantepui; VIII - Imeri.

817 **Figures**

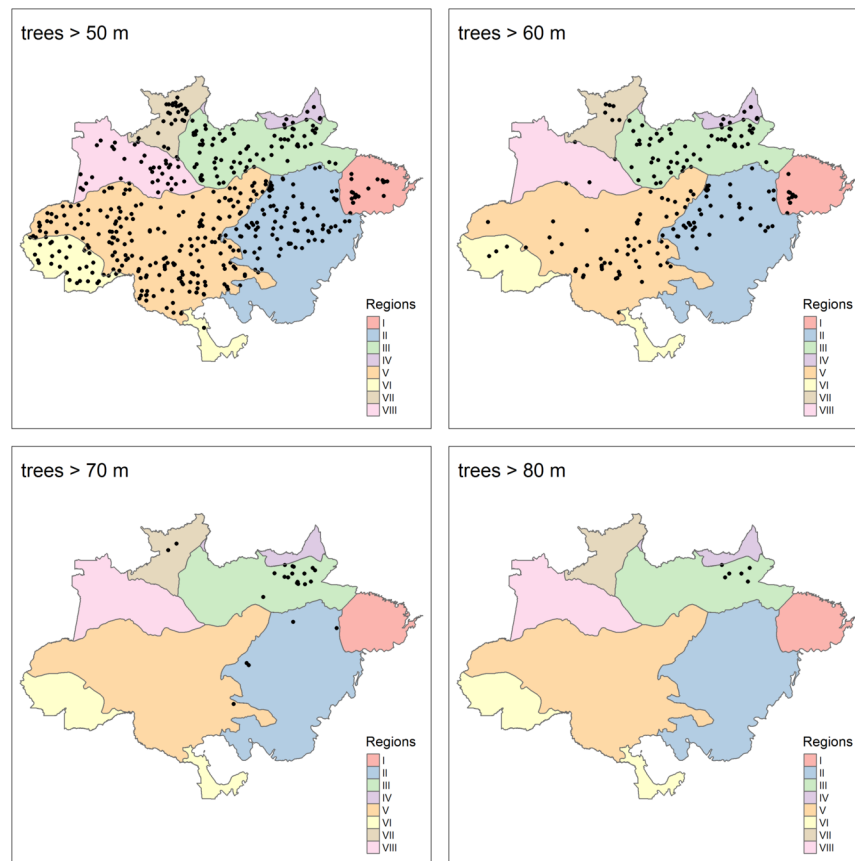

Figure 1: Maps of the Brazilian Amazon showing the location of trees  $> 50$  m,  $> 60$  m,  $> 70$  m, and  $> 80$  m in height. Black circles indicate the presence of a tree above the height thresholds. Background color indicates the biogeographical subdivisions proposed by (Morrone 2014): I - Para; II - Xingu-Tapajos; III - Roraima; IV - Guianan Lowlands; V - Madeira; VI - Yungas; VII - Pantepui; VIII - Imeri.



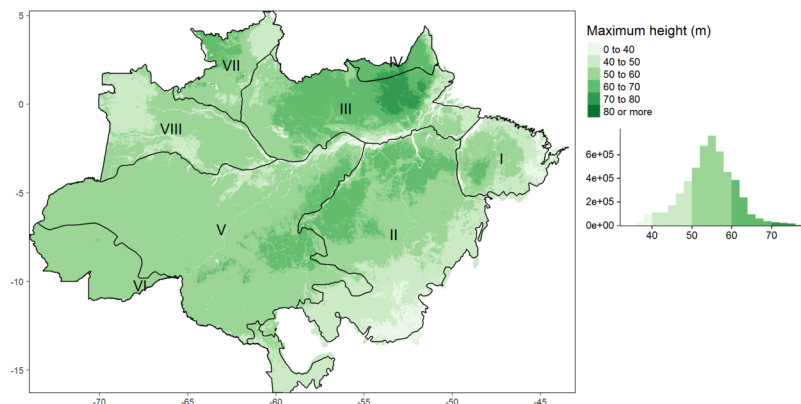

Figure 2: Maximum height estimation based on remote sensing variables estimated by Random Forest method. Black lines indicate the biogeographical subdivisions: I - Para; II - Xingu-Tapajos; III - Roraima; IV - Guianan Lowlands; V - Madeira; VI - Yungas; VII - Pantepui; VIII - Imeri.

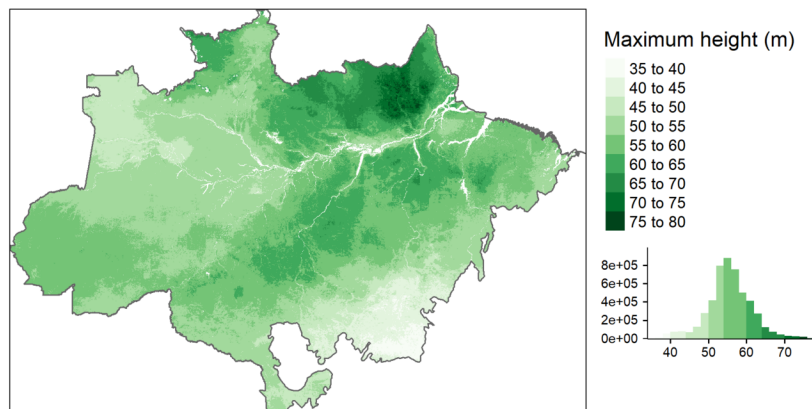

Figure 3: Maximum tree height distribution when FAPAR values under 80% were excluded from our analysis.

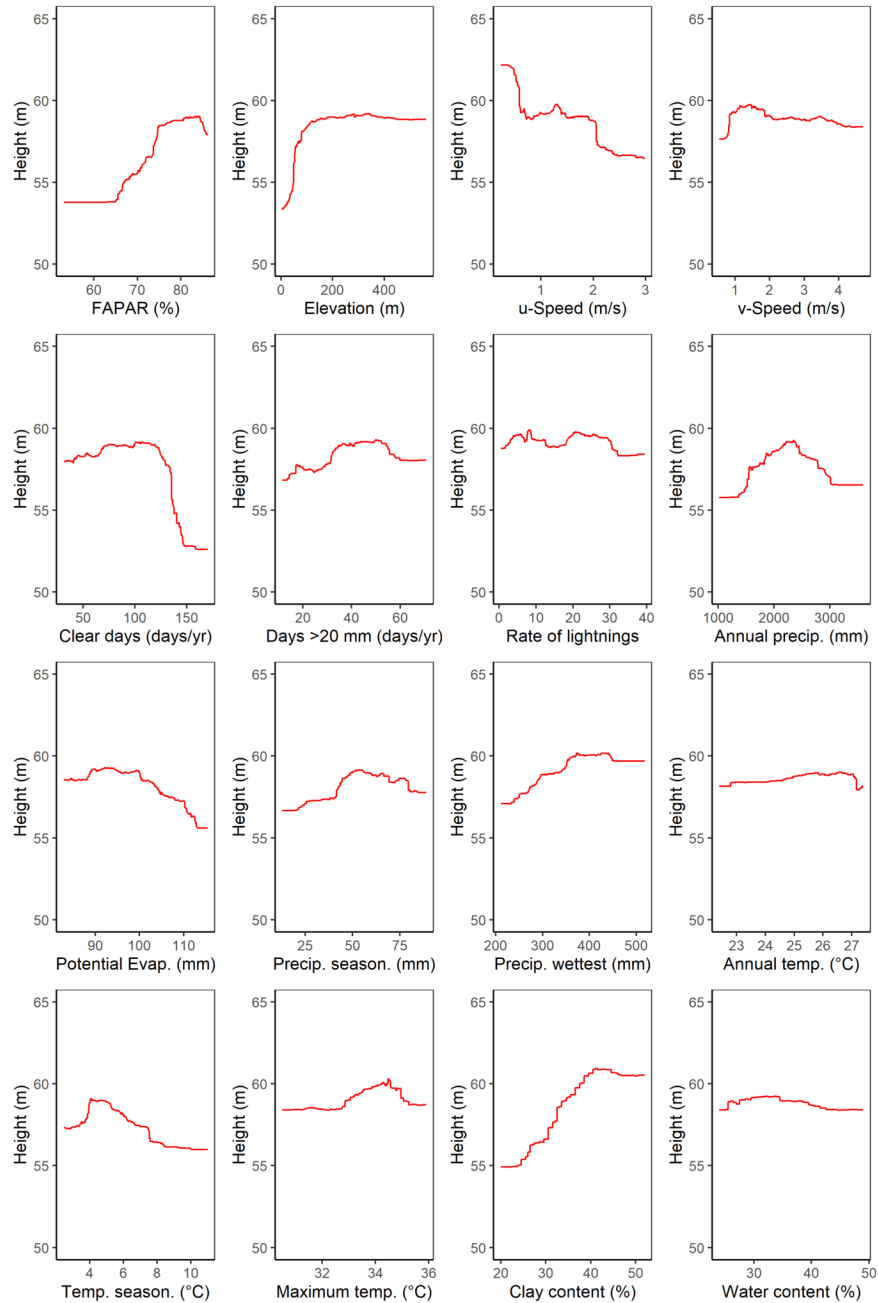

Figure 4: Marginal plot for each variable considering the Random Forest model for maximum height estimation

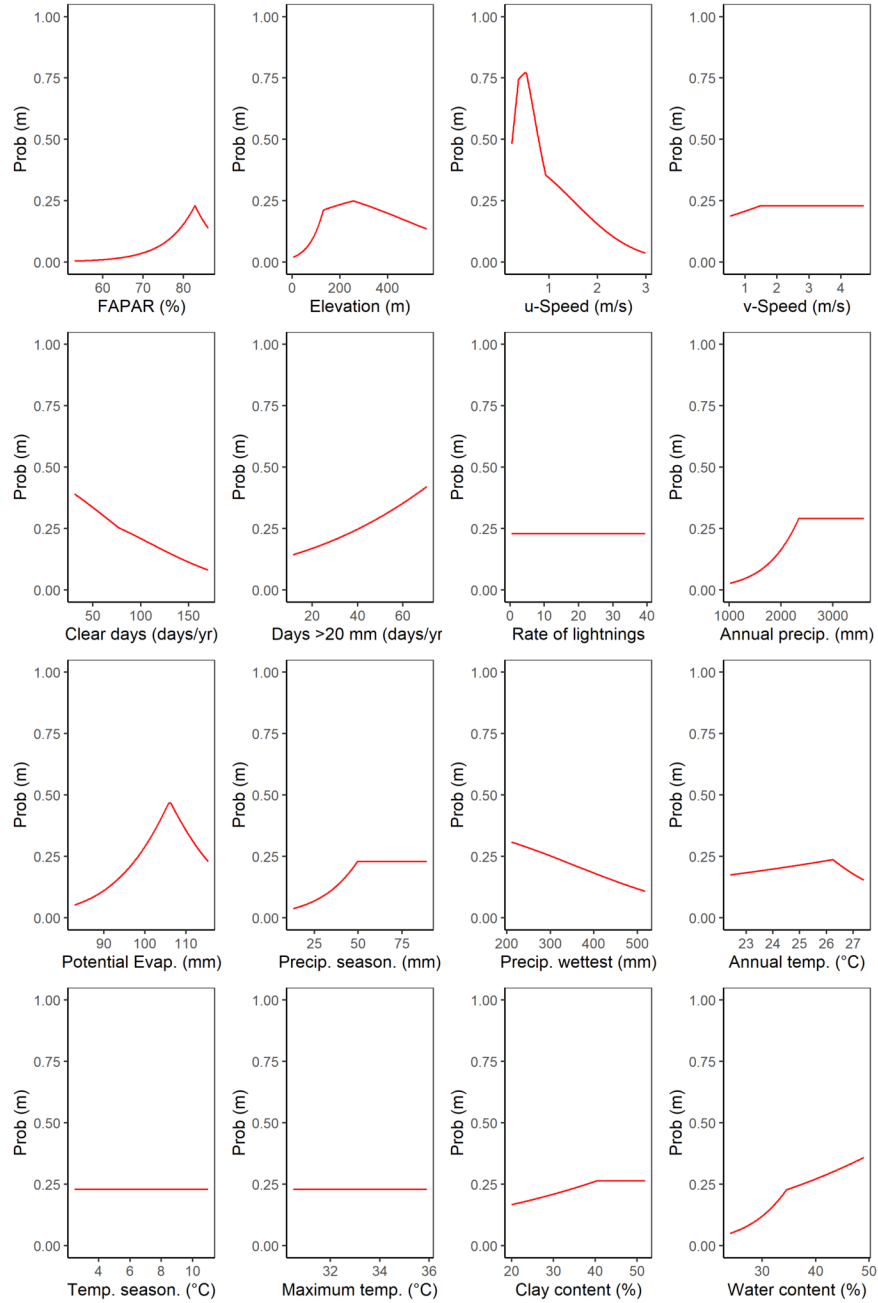

Figure 5: Marginal plot for each variable considering the Maximum Entropy model for niche determination

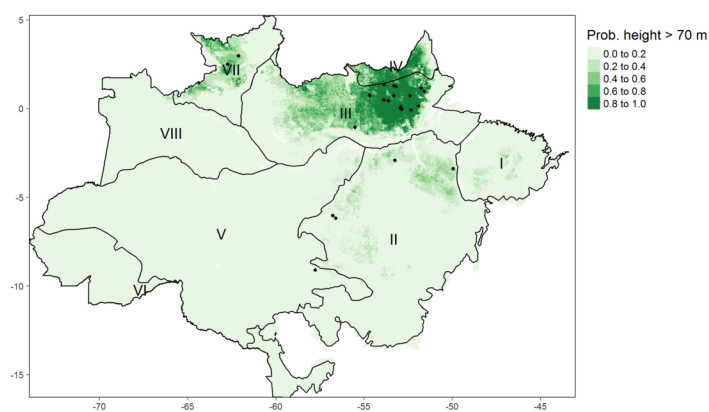

Figure 6: Occurrence of giant trees (black dots) and niche capability to support the development of tall trees (probability of tall tree occurrence). Black lines indicate the biogeographical subdivisions: I - Para; II - Xingu-Tapajos; III - Roraima; IV - Guianan Lowlands; V - Madeira; VI - Yungas; VII - Pantepui; VIII - Imeri.
